# Supplementary material
Source: PubMed Central journal article supplement (PMC5742362)
Supplement: NIHMS926282-supplement-Figures.pdf [file NIHMS926282-supplement-Figures.pdf]

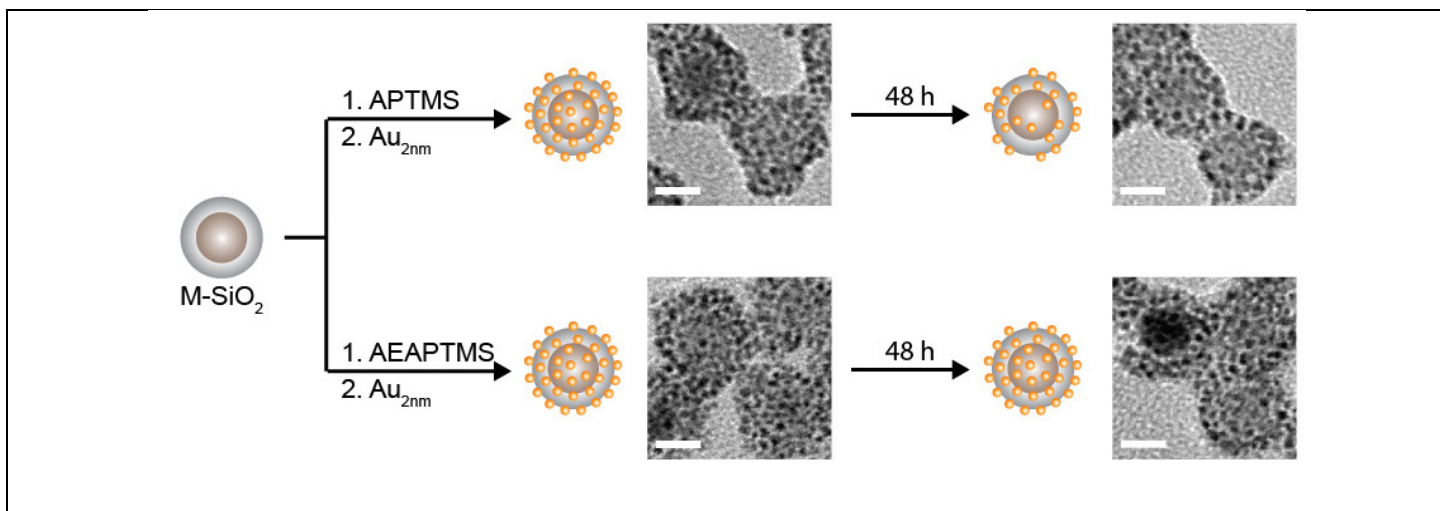

### Supplementary Figure 1

Functional group-dependent chemical stability of M-SiO<sub>2</sub>(Au<sub>2nm</sub>)<sub>n</sub>.

Reaction of Au<sub>2nm</sub> seeds with 20 nm APTMS or AEAPTMS functionalized M-SiO<sub>2</sub> yielded 161±11 and 165±10 Au seeds per M-SiO<sub>2</sub>, respectively. The chemical stability of the respective conjugates was examined by incubating them in 1 mM Tris-HCl buffer (pH 8.0) for 48 hr. Significant portion of Au seeds were detached from M-SiO<sub>2</sub>(Au<sub>2nm</sub>)<sub>n</sub> (Au seeds per M-SiO<sub>2</sub> after 48hr incubation: 98.1±17) produced by the APTMS conjugation chemistry, whereas negligible changes were observed for the AEAPTMS case (n = 161±15). Scale bar, 10 nm.

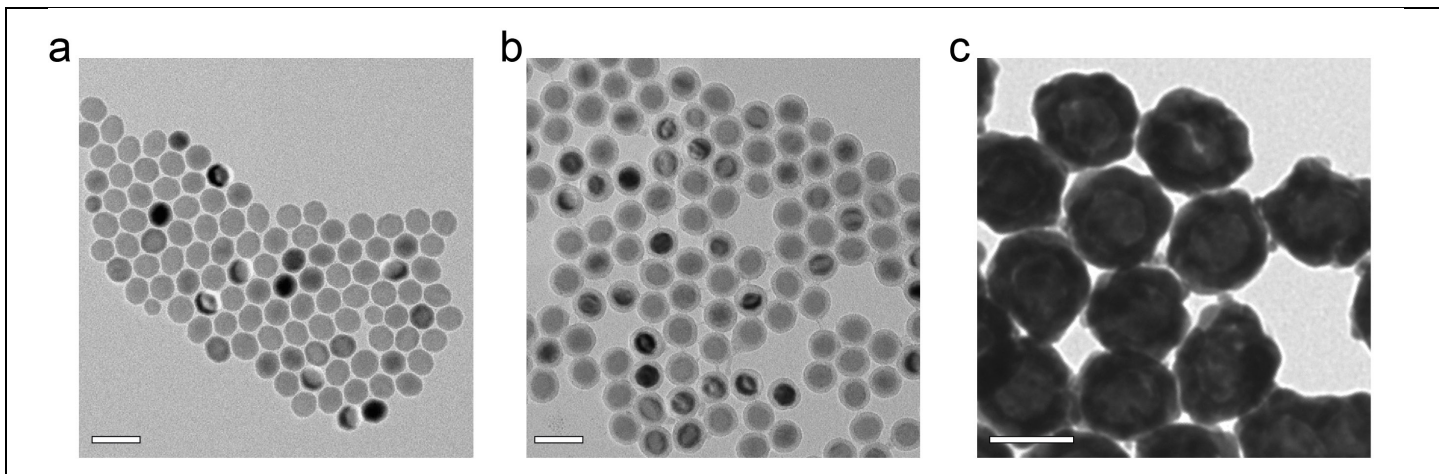

### Supplementary Figure 2

Synthesis of MPNs having a 30 nm iron oxide magnetic core.

(a) TEM images of 30 nm iron oxide magnetic nanoparticles, (b) silica-coated magnetic nanoparticles (silica thickness, 4 nm), and (c) MPNs (diameter,  $55 \pm 6.7$  nm). 30 nm iron oxide nanoparticles are used in step 14. Scale bar, 50 nm.

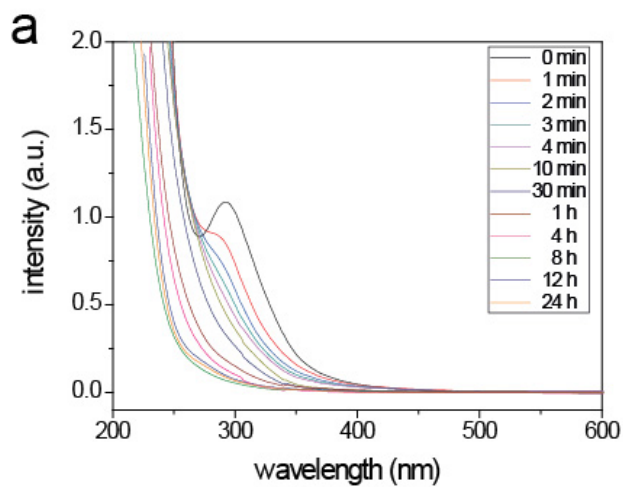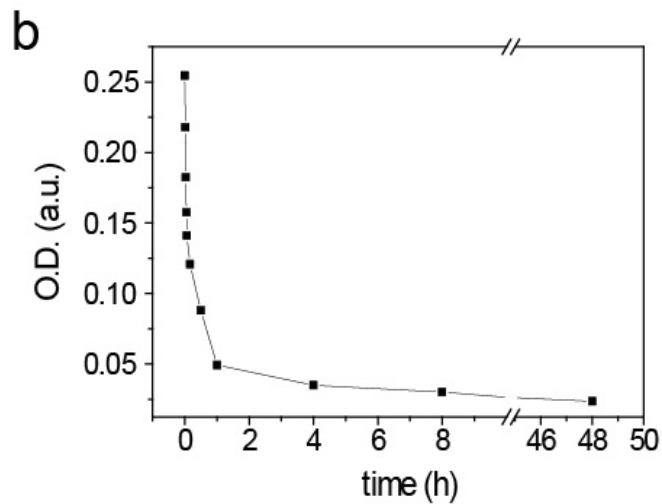

### Supplementary Figure 3

Time dependent changes in absorbance of the gold growth solution.

(a) UV-Vis absorption spectra and (b) changes in absorbance at 290 nm of the gold growth solution as a function of time.
